# Supplementary material for: Normalized long read RNA sequencing in chicken reveals transcriptome complexity similar to human
Source: PubMed Central journal article supplement (PMC5404281; doi:10.1186/s12864-017-3691-9), 2017-04-24
Supplement: 12864_2017_3691_MOESM1_ESM.pdf [file 12864_2017_3691_MOESM1_ESM.pdf]

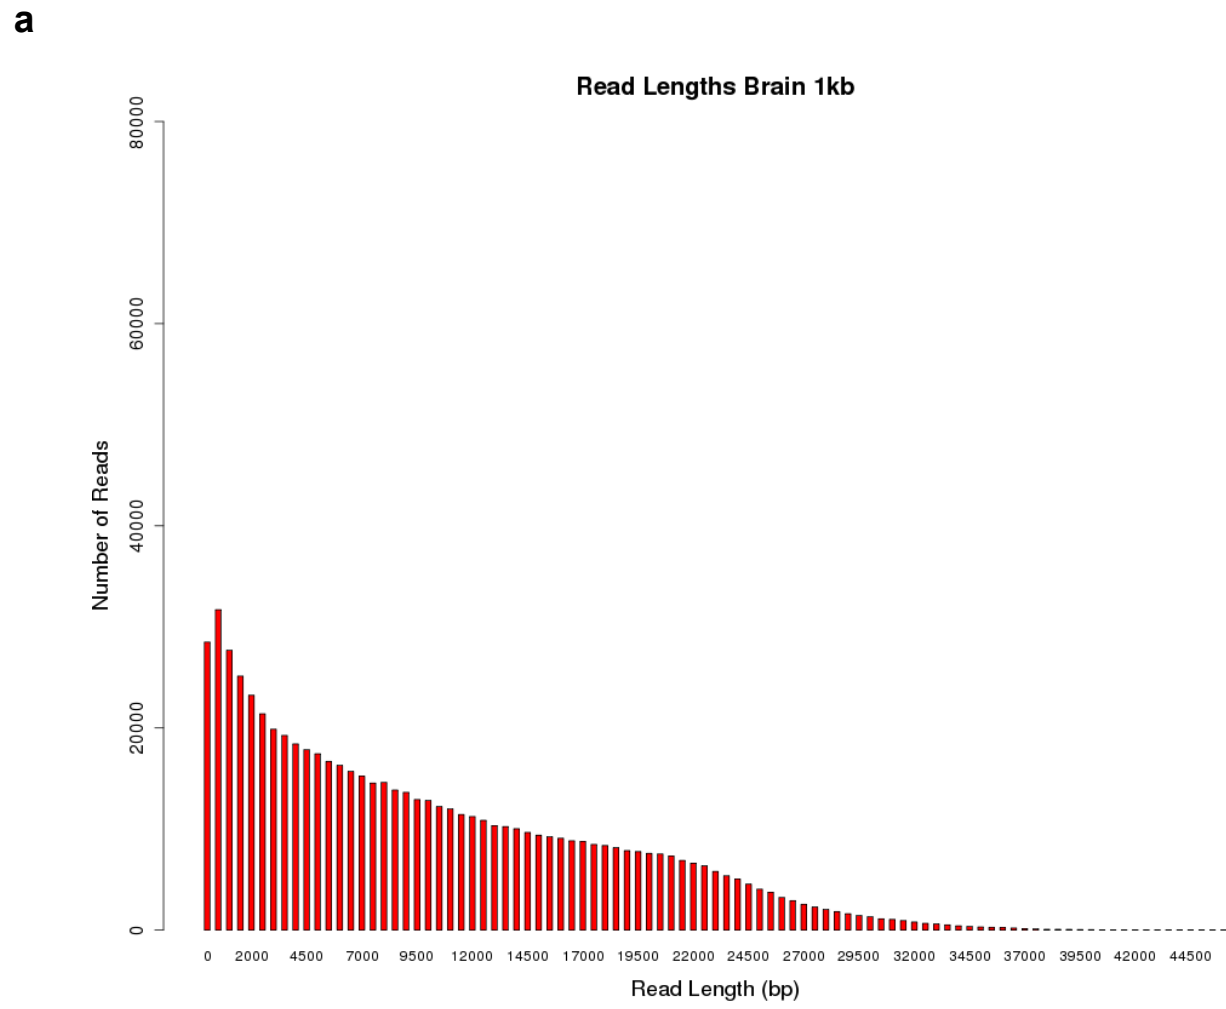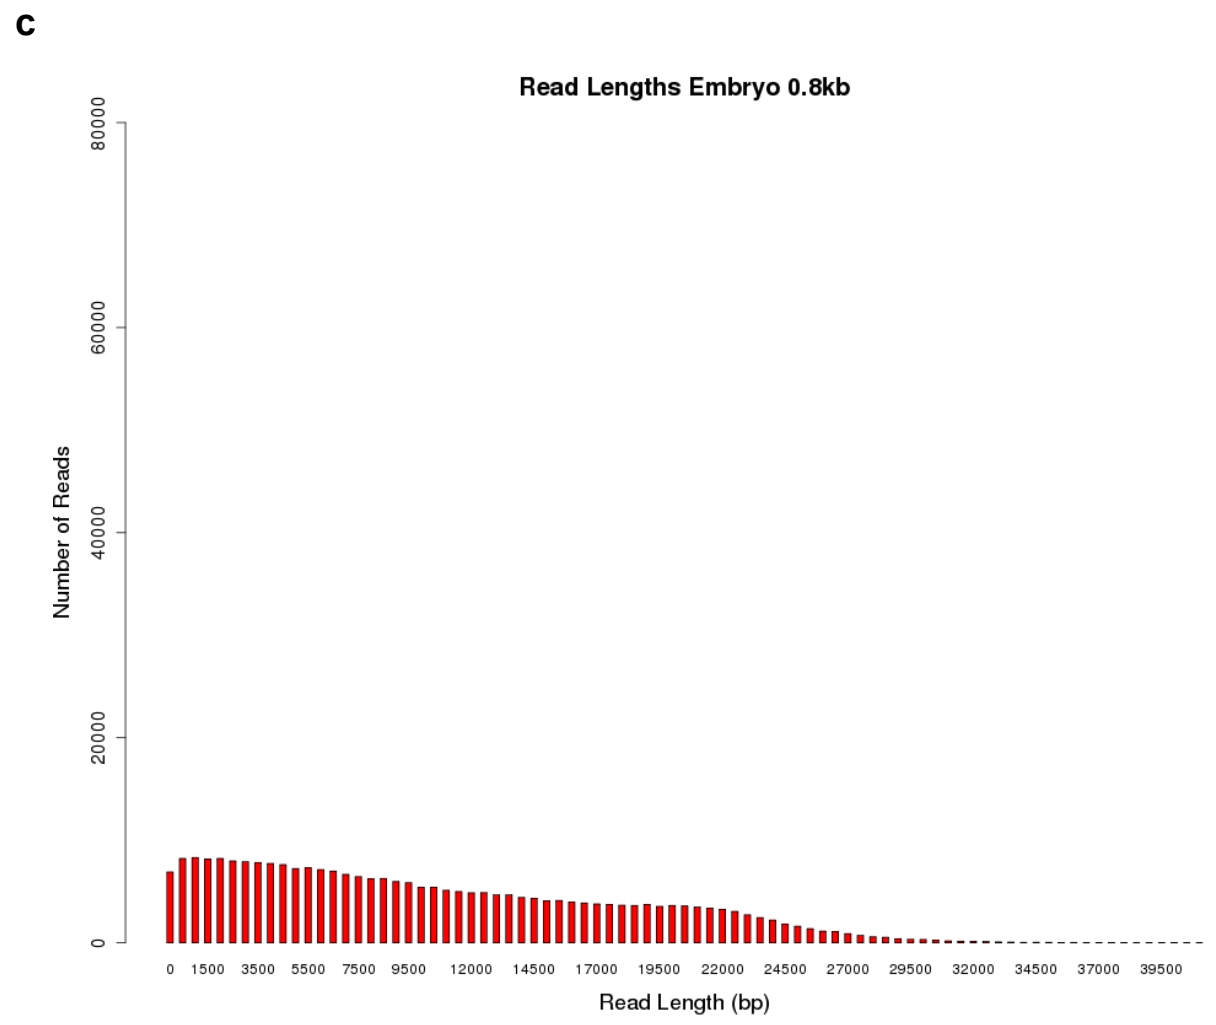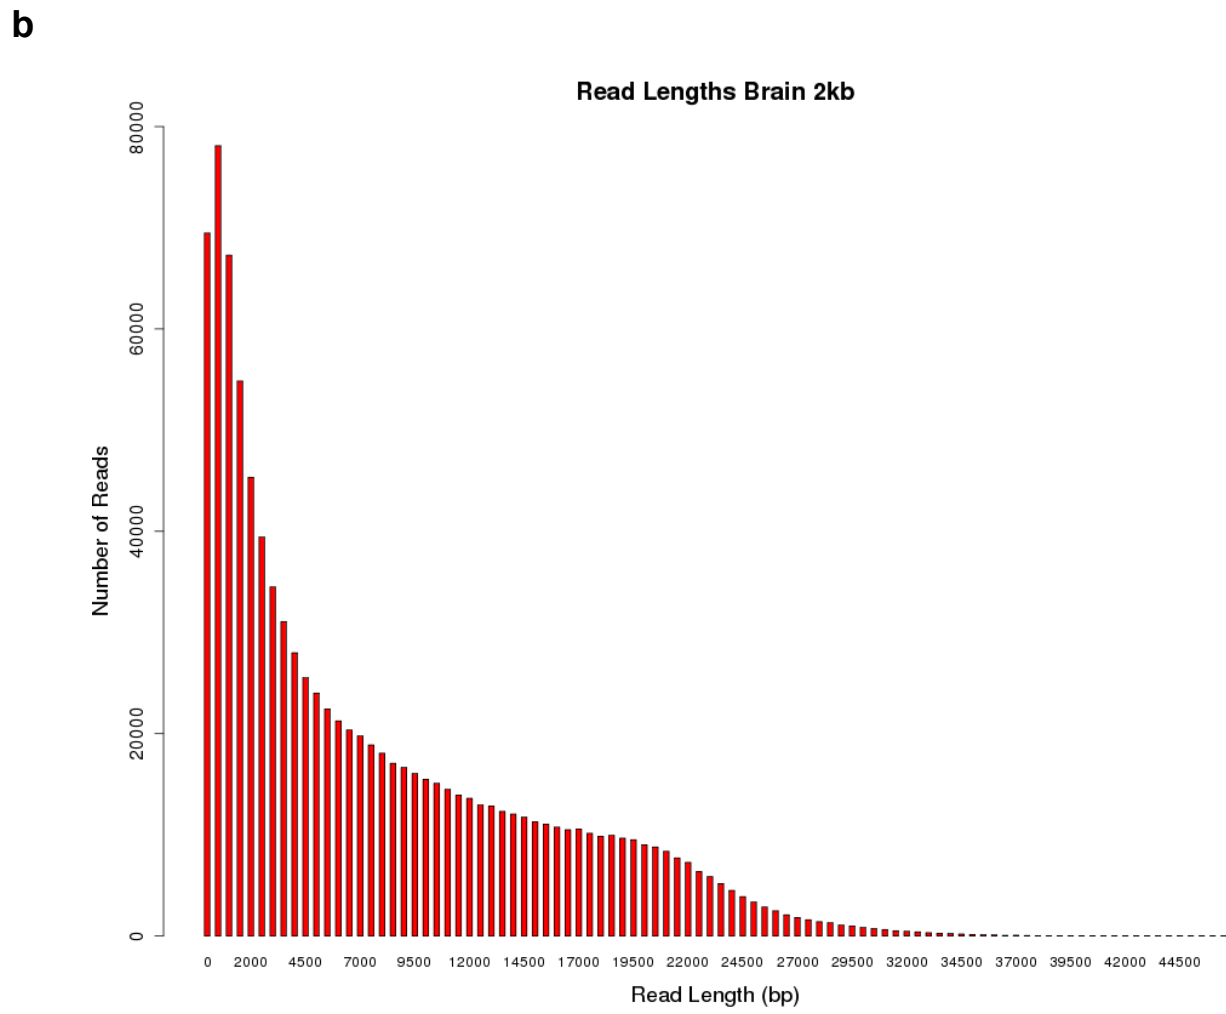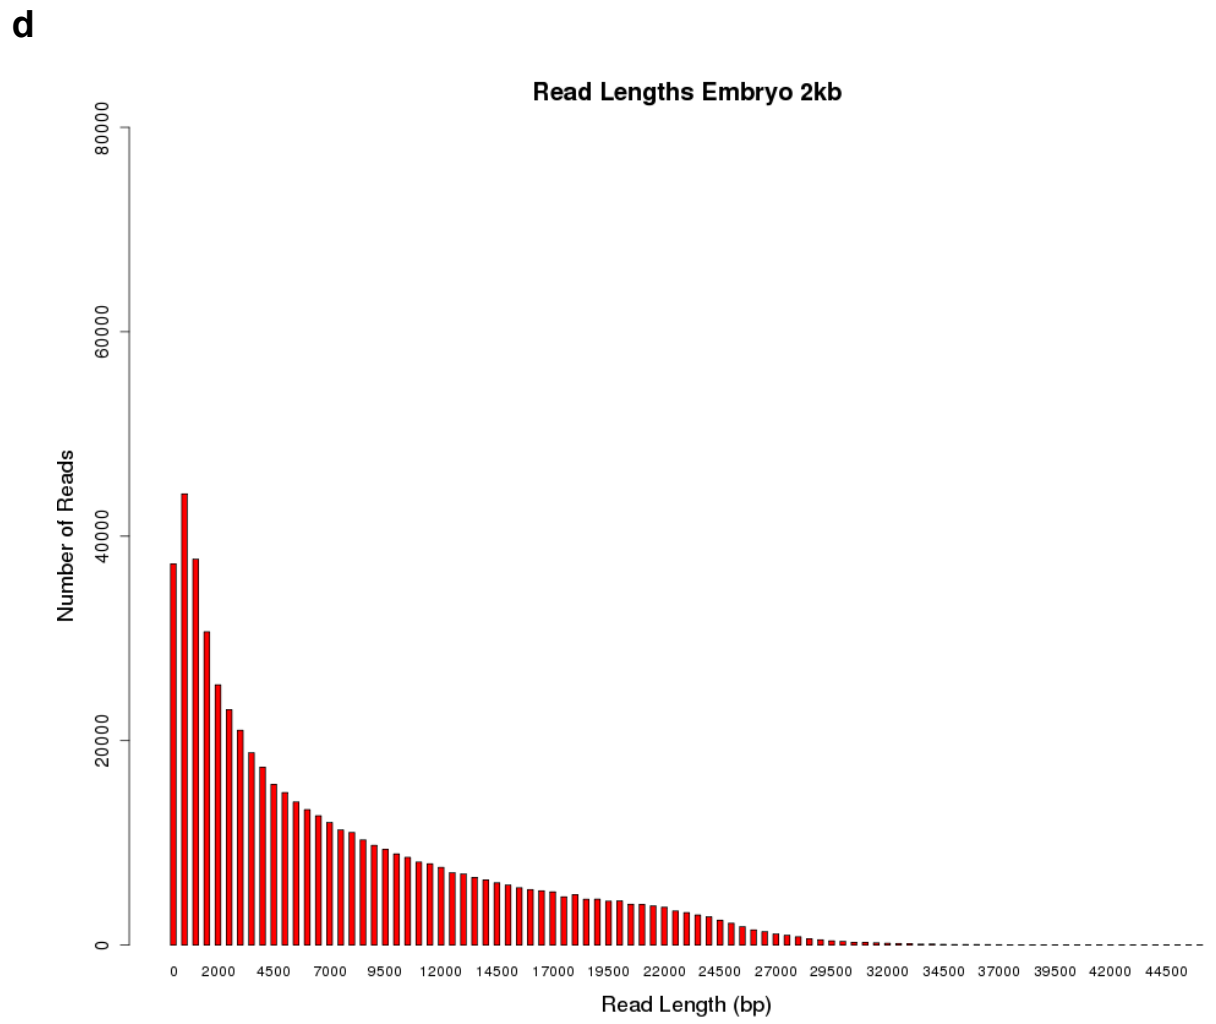

**Additional File 1 | PacBio sequencing read lengths** (a) Read lengths for chicken brain 1-kb size selection. (b) Read lengths for chicken brain 2-kb size selection. (c) Read lengths for chicken embryo 0.8-kb size selection. (d) Read lengths for chicken embryo 2-kb size selection.
